# Supplementary material for: Effect of butterfly-shaped sulfur-bridged ligand and counter anions on the catalytic activity and diastereoselectivity of organobismuth complexes
Source: Royal Society of Chemistry journal article supplement (doi:10.1039/c0dt01419b), 2011-01-01
Supplement: c0dt01419b.pdf [file c0dt01419b.pdf]

## Effect of butterfly-shaped sulfur-bridged ligand and counter anions on the catalytic activity and diastereoselectivity of organobismuth complexes

Renhua Qiu,<sup>a</sup> Shuangfeng Yin,<sup>\*,a</sup> Xingxing Song,<sup>a</sup> Zhengong Meng,<sup>a</sup> Yimiao Qiu,<sup>a</sup> Nianyuan Tan,<sup>a</sup> Xinhua Xu,<sup>a</sup> Shenglian Luo,<sup>a</sup> Feng-Rong Dai,<sup>b</sup> Chak-Tong Au,<sup>\*,a,b</sup> Wai-Yeung Wong<sup>\*,b</sup>

<sup>a</sup> College of Chemistry and Chemical Engineering, Hunan University, Changsha, 410082, China. Tel/ Fax: (+86)-731-8821310. E-mail: sfyin73@yahoo.com.cn

<sup>b</sup> Department of Chemistry, Hong Kong Baptist University, Kowloon Tong, Hong Kong, China. Tel/Fax: 852-3411-7348. E-mail: pctau@hkbu.edu.hk; rwywong@hkbu.edu.hk.

### Experimental Section

There exist O-H...O or O-H...F hydrogen bonds between the anions and cations in compounds 2-5, as shown in Table S1 and Figures S1-S4.

**Table S1** Hydrogen-bonding geometry (Å) of compounds 2-5.

|          | D-H...A                   | D-H       | H...A    | D...A     | D-H...A |
|----------|---------------------------|-----------|----------|-----------|---------|
| <b>2</b> | O1-H1B...O5               | 0.83(2)   | 1.89(4)  | 2.712(17) | 169(16) |
|          | O1-H1A...O4A <sup>a</sup> | 0.83(2)   | 1.97(3)  | 2.801(17) | 176(14) |
|          | O1-H1B...O5A <sup>a</sup> | 0.83(2)   | 2.62(10) | 3.182(17) | 126(10) |
| <b>3</b> | O1-H1B...F1               | 0.85(2)   | 1.90(4)  | 2.725(8)  | 166(12) |
|          | O1-H1A...F3A <sup>b</sup> | 0.85(2)   | 1.90(4)  | 2.733(10) | 166(12) |
| <b>4</b> | O1-H1A...O4A <sup>c</sup> | 0.91(2)   | 1.82(5)  | 2.676(5)  | 157(12) |
|          | O1-H1...O3A <sup>d</sup>  | 0.888(19) | 1.82(2)  | 2.706(6)  | 173(5)  |
| <b>5</b> | O1-H1A...O4A <sup>e</sup> | 0.852(11) | 2.52(12) | 2.755(14) | 97(9)   |
|          | O1-H1B...O3A <sup>f</sup> | 0.851(11) | 1.80(3)  | 2.64(2)   | 171(13) |

Symmetry codes: <sup>a</sup> x, -0.5-y, 0.5+z; <sup>b</sup> x, -y-1.5, 0.5+z; <sup>c</sup> x, -y+0.5, z+0.5; <sup>d</sup> x, y-1, z+1; <sup>e</sup> x, 1.5-y, 0.5+z; <sup>f</sup> x, y+1, z

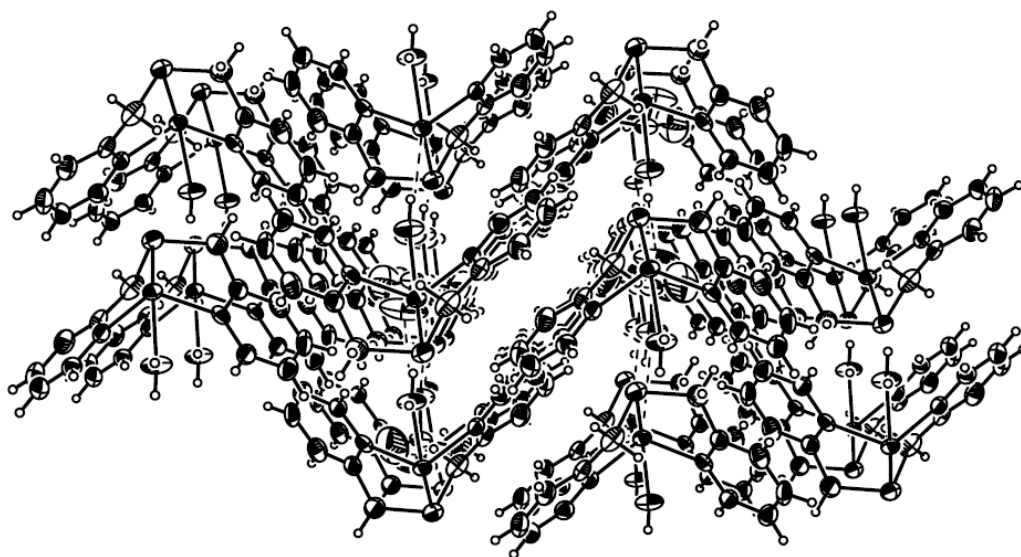

**Figure S1.** Packing drawing of the complex 2 along *b* axis with 30% thermal ellipsoid probability.

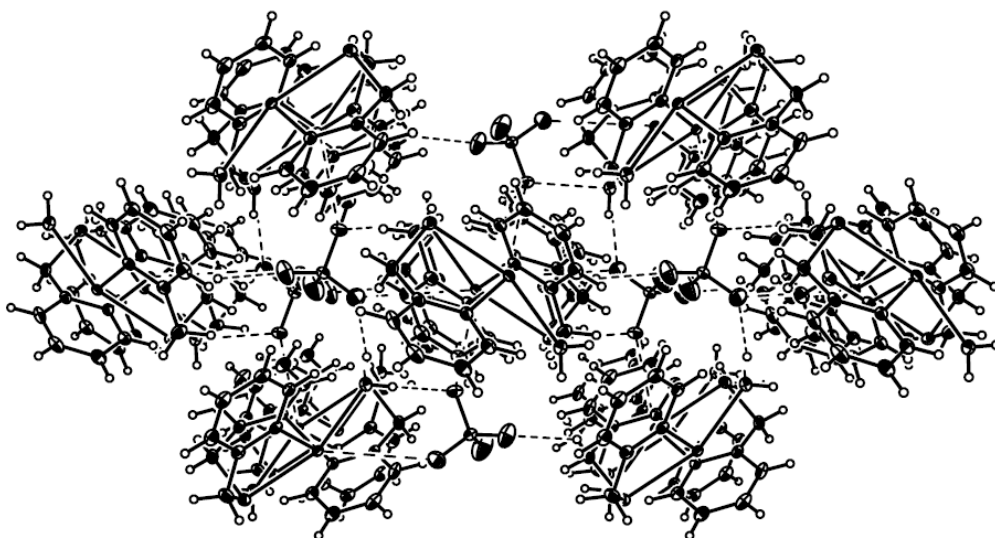

**Figure S2.** Packing drawing of the complex 3 along *a* axis with 30% thermal ellipsoid probability.

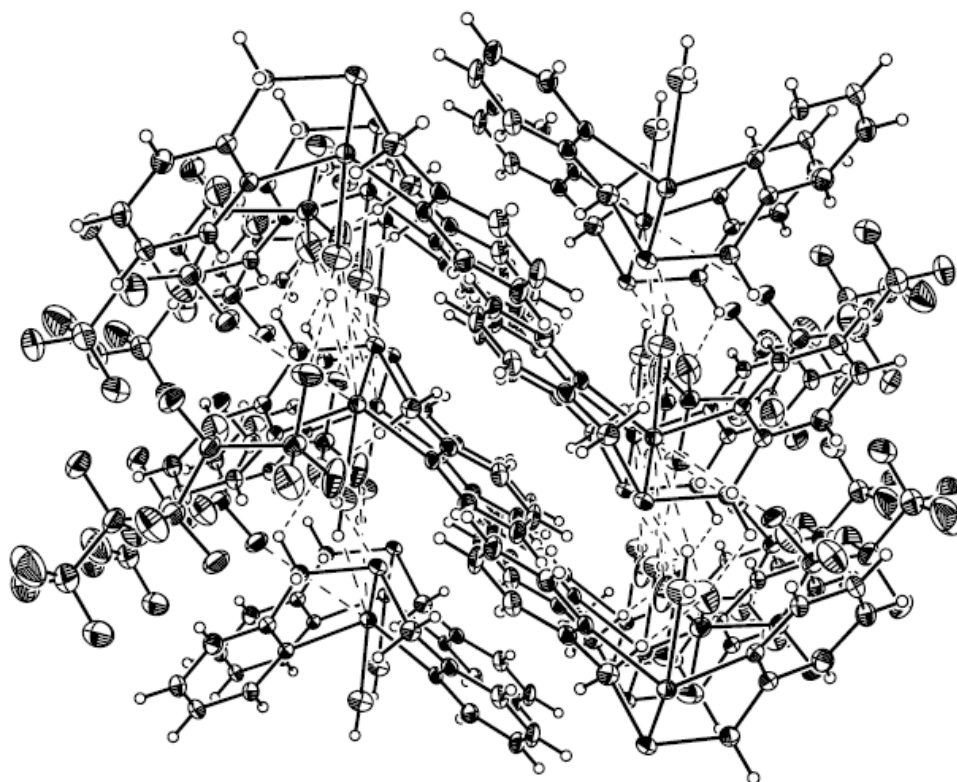

**Figure S3.** Packing drawing of the complex 4 along *b* axis with 30% thermal ellipsoid probability.

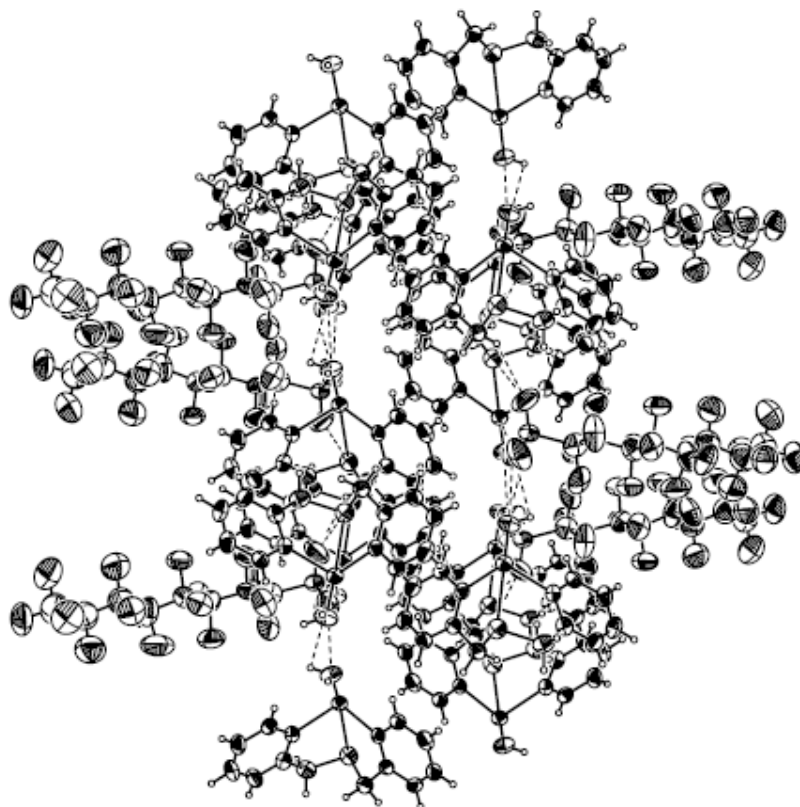

**Figure S4.** Packing drawing of the complex 5 along *c* axis with 30% thermal ellipsoid probability.

**Table S2** Hydrogen-bonding geometry (Å) of complex **1**.

| D-H...A                      | D-H  | H...A | D...A     | D-H...A |
|------------------------------|------|-------|-----------|---------|
| C8-H8B...Cl1 <sup>a</sup>    | 0.97 | 2.64  | 3.606(17) | 171.7   |
| C13-H13A...Cl1               | 0.93 | 2.65  | 3.37(2)   | 134.6   |
| C16-H16A...Cl2               | 0.93 | 2.71  | 3.401(19) | 131.6   |
| C21-H21B...Cl2A <sup>b</sup> | 0.97 | 2.70  | 3.666(17) | 174.0   |
| C36-H36A...Cl3A <sup>c</sup> | 0.97 | 2.70  | 3.666(17) | 172.2   |
| C41-H41A...Cl3               | 0.93 | 2.71  | 3.409(19) | 132.2   |
| C50-H50A...Cl4 <sup>d</sup>  | 0.97 | 2.72  | 3.674(17) | 169.2   |
| C55-H55A...Cl4               | 0.93 | 2.72  | 3.401(16) | 130.7   |

Symmetry codes: <sup>a</sup> x-1, y, z; <sup>b</sup> x, 1+y, z; <sup>c</sup> x, y-1, z; <sup>d</sup> x+1, y, z.

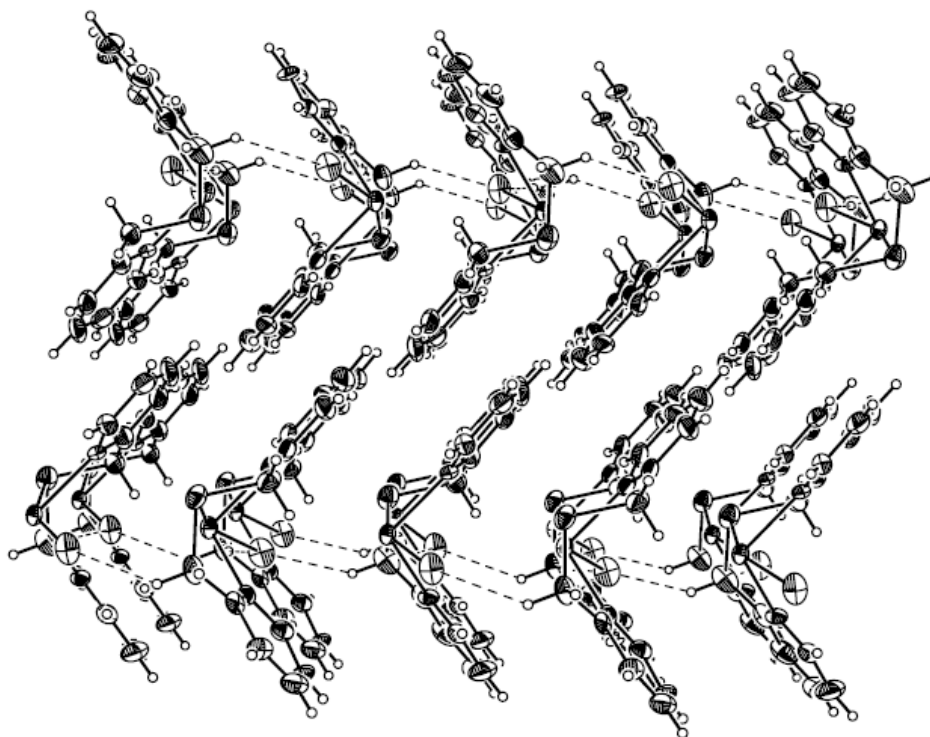

**Fig. S5** Packing drawing of the complex **1** along *a* axis with 30% thermal ellipsoid probability.
